# Supplementary material for: Understanding of magnetic behavior of the pseudo-binary Co2−xNixZn11: in the light of crystal and electronic structures
Source: Royal Society of Chemistry journal article supplement (doi:10.1039/d4dt01498g), 2024-01-01
Supplement: d4dt01498g1.pdf [file d4dt01498g1.pdf]

## Understanding of magnetic behavior of the pseudo-binary $\text{Co}_{2-x}\text{Ni}_x\text{Zn}_{11}$ : in the light of crystal and electronic structures

Amit Mondal<sup>†</sup>, Sandip Kumar Kuila<sup>†,¶</sup>, Rahul Pan<sup>†,¶</sup>, Shubham Patel<sup>††</sup>, Krishnendu Buxi<sup>†</sup>, Subhadip Saha<sup>†</sup>, Sivaprasad Ghanta<sup>†</sup>, Maxim Avdeev<sup>†††</sup>, Partha Pratim Jana<sup>†\*</sup>

(<sup>¶</sup> equal contribution)

<sup>†</sup>Department of Chemistry, IIT Kharagpur, Kharagpur, 721302, India

<sup>††</sup>Department of Physics, IIT Kharagpur, Kharagpur, 721302, India

<sup>†††</sup> Australian Nuclear Science and Technology Organisation, New Illawarra Road, Lucas Heights, NSW 2234, Australia

<sup>†††</sup> School of Chemistry, The University of Sydney, Sydney 2006, Australia

[ppj@chem.iitkgp.ac.in](mailto:ppj@chem.iitkgp.ac.in)

### Supporting Information

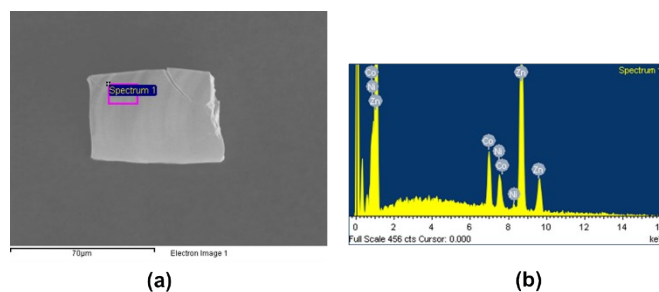

Fig. S1. (a) SEM image of the single crystal and (b) EDS spectrum of SC3 ( $\text{Co}_{1.1}\text{Ni}_{0.9}\text{Zn}_{11}$ ).

| Sample code | Loaded composition                             | Loaded composition (at. %)                           | EDS composition (at. %)                              |
|-------------|------------------------------------------------|------------------------------------------------------|------------------------------------------------------|
| SC1         | $\text{Co}_{1.7}\text{Ni}_{0.3}\text{Zn}_{11}$ | $\text{Co}_{13.08}\text{Ni}_{2.30}\text{Zn}_{84.62}$ | $\text{Co}_{13.10}\text{Ni}_{2.24}\text{Zn}_{84.66}$ |
| SC2         | $\text{Co}_{1.4}\text{Ni}_{0.6}\text{Zn}_{11}$ | $\text{Co}_{10.77}\text{Ni}_{4.61}\text{Zn}_{84.62}$ | $\text{Co}_{10.11}\text{Ni}_{4.40}\text{Zn}_{85.49}$ |
| SC3         | $\text{Co}_{1.1}\text{Ni}_{0.9}\text{Zn}_{11}$ | $\text{Co}_{8.46}\text{Ni}_{6.92}\text{Zn}_{84.62}$  | $\text{Co}_{8.32}\text{Ni}_{6.51}\text{Zn}_{85.17}$  |
| SC4         | $\text{Co}_{0.8}\text{Ni}_{1.2}\text{Zn}_{11}$ | $\text{Co}_{6.15}\text{Ni}_{9.23}\text{Zn}_{84.62}$  | $\text{Co}_{6.54}\text{Ni}_{9.72}\text{Zn}_{83.74}$  |
| SC5         | $\text{Co}_{0.5}\text{Ni}_{1.5}\text{Zn}_{11}$ | $\text{Co}_{3.84}\text{Ni}_{11.54}\text{Zn}_{84.62}$ | $\text{Co}_{3.42}\text{Ni}_{10.99}\text{Zn}_{85.59}$ |
| SC6         | $\text{Co}_{0.2}\text{Ni}_{1.8}\text{Zn}_{11}$ | $\text{Co}_{1.53}\text{Ni}_{13.85}\text{Zn}_{84.62}$ | $\text{Co}_{1.27}\text{Ni}_{13.04}\text{Zn}_{85.69}$ |

Table S1. Sample codes with their loaded composition and EDS composition.

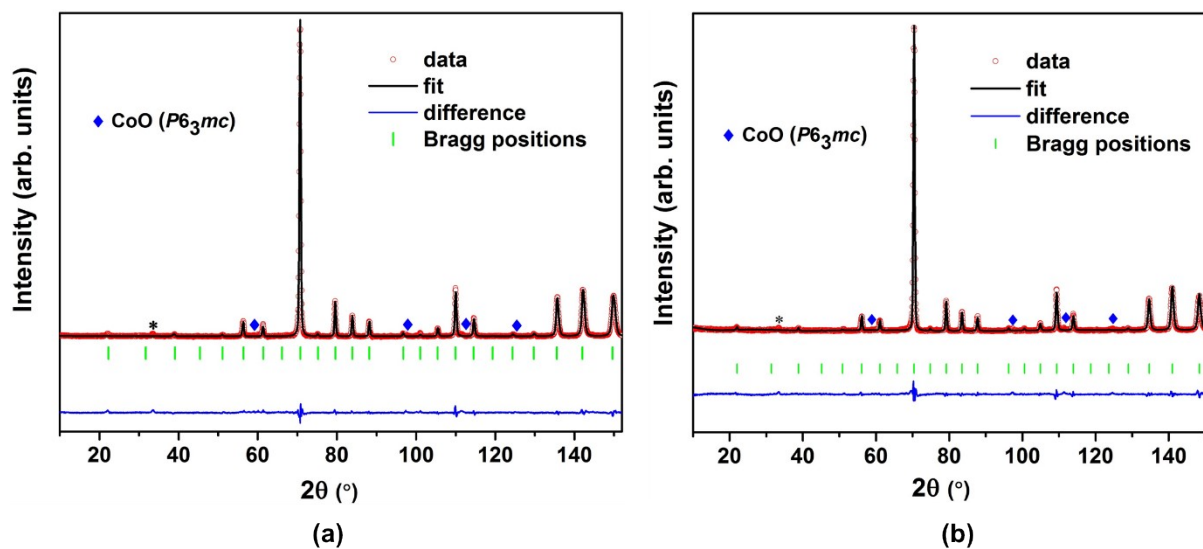

Fig. S2. Neutron powder diffraction data collected at (a) 3 K and (b) room temperature (300 K) for  $\text{Co}_{1.1}\text{Ni}_{0.9}\text{Zn}_{11}$ . The asterisks show  $\sim 0.5\%$  of  $\lambda/2$  harmonics.

Fig. S3. Neutron powder diffraction data collected at (a) 3 K and (b) room temperature (300 K) for  $\text{Co}_{0.5}\text{Ni}_{1.5}\text{Zn}_{11}$ . The asterisks show  $\sim 0.5\%$  of  $\lambda/2$  harmonics.

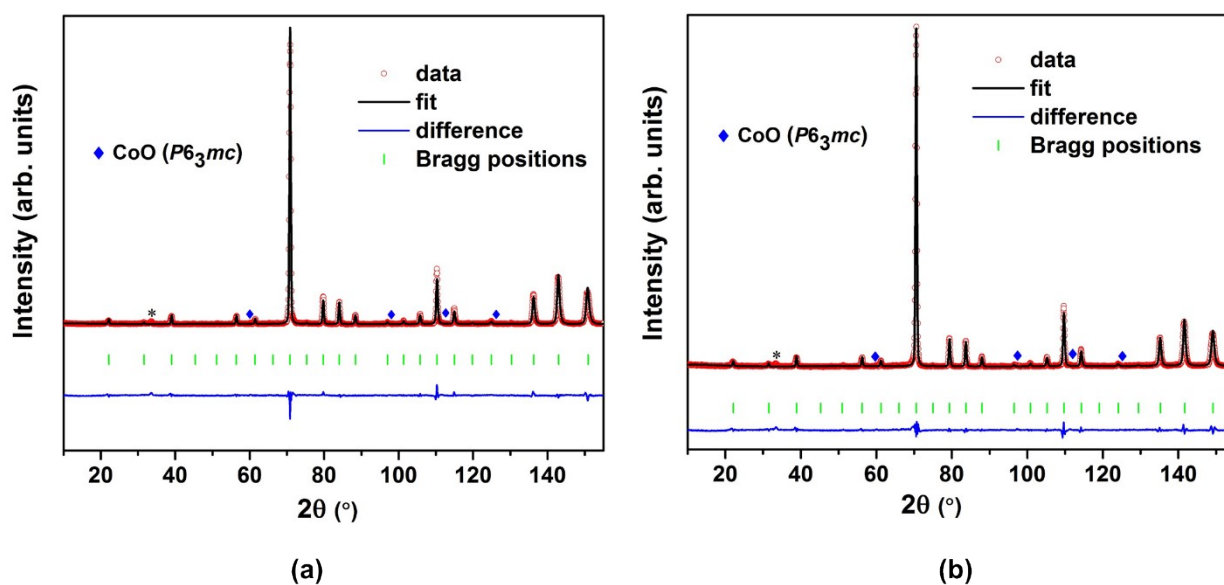

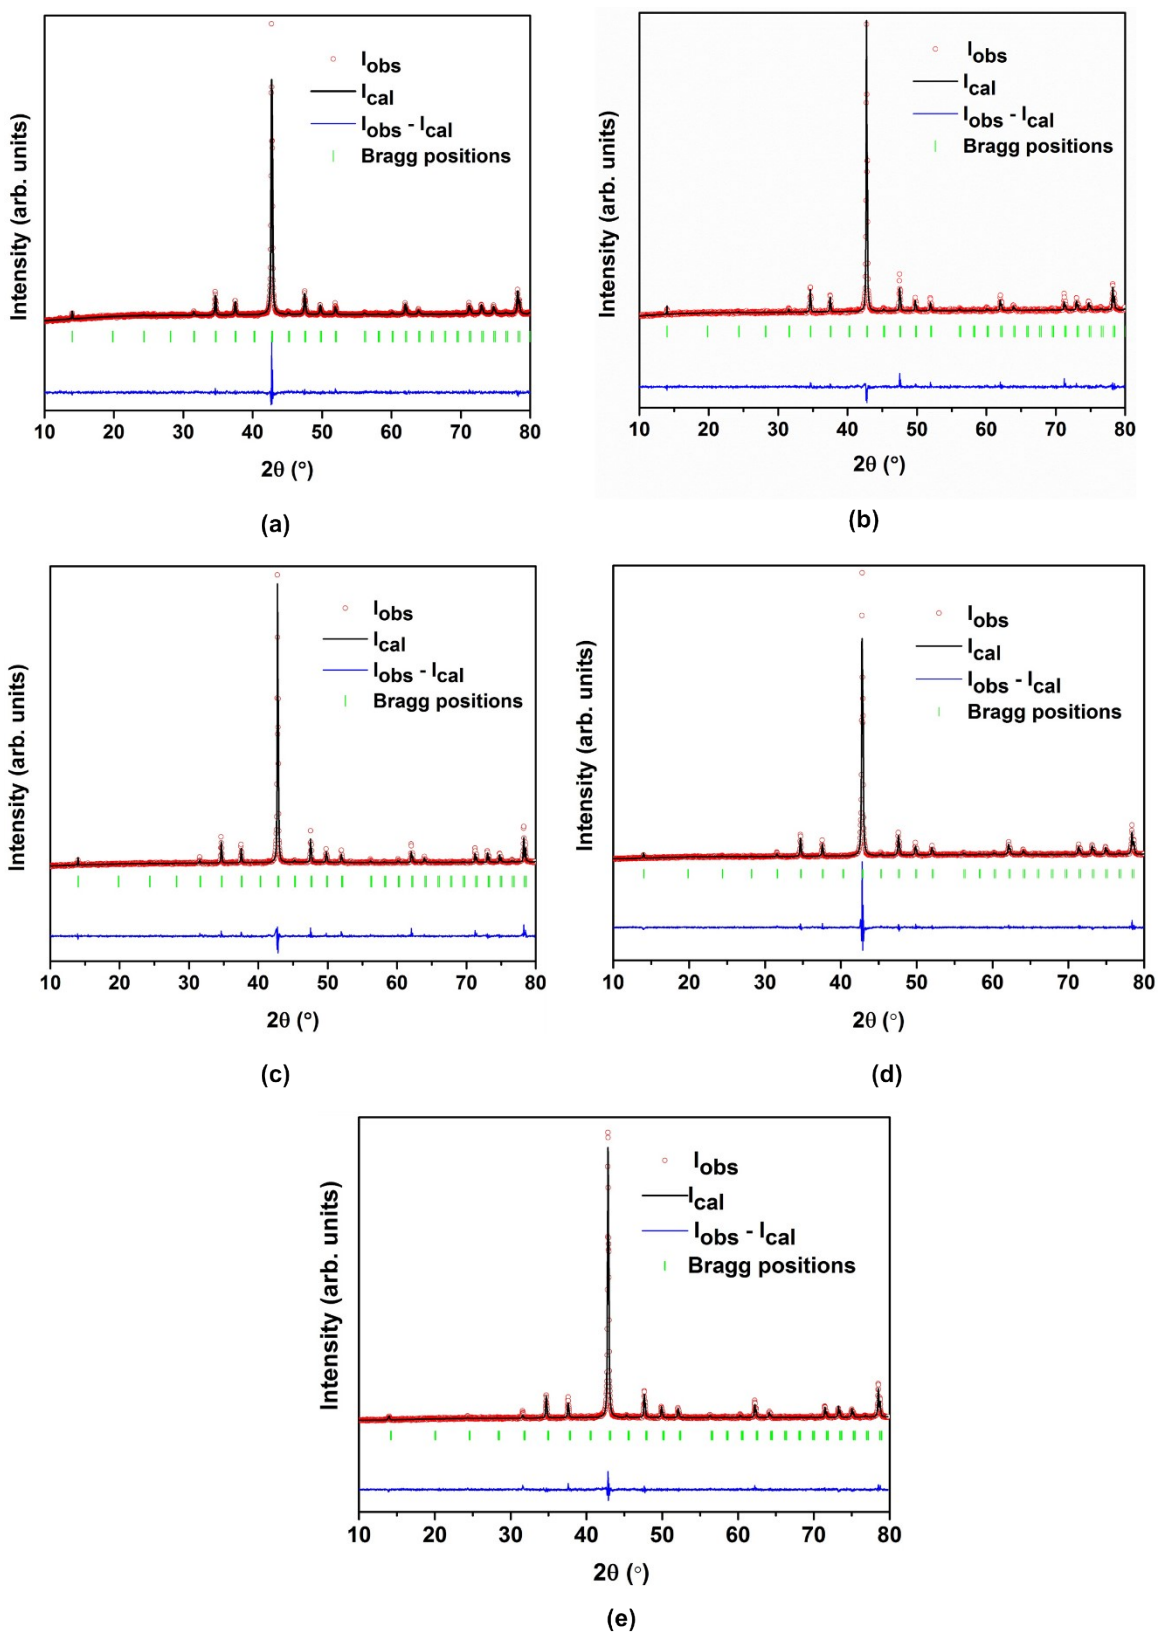

Fig. S4. Rietveld refinement plots for (a)  $\text{Co}_{1.4}\text{Ni}_{0.6}\text{Zn}_{11}$ , (b)  $\text{Co}_{1.1}\text{Ni}_{0.9}\text{Zn}_{11}$ , (c)  $\text{Co}_{0.8}\text{Ni}_{1.2}\text{Zn}_{11}$ , (d)  $\text{Co}_{0.5}\text{Ni}_{1.5}\text{Zn}_{11}$ , and (e)  $\text{Co}_{0.2}\text{Ni}_{1.8}\text{Zn}_{11}$ .

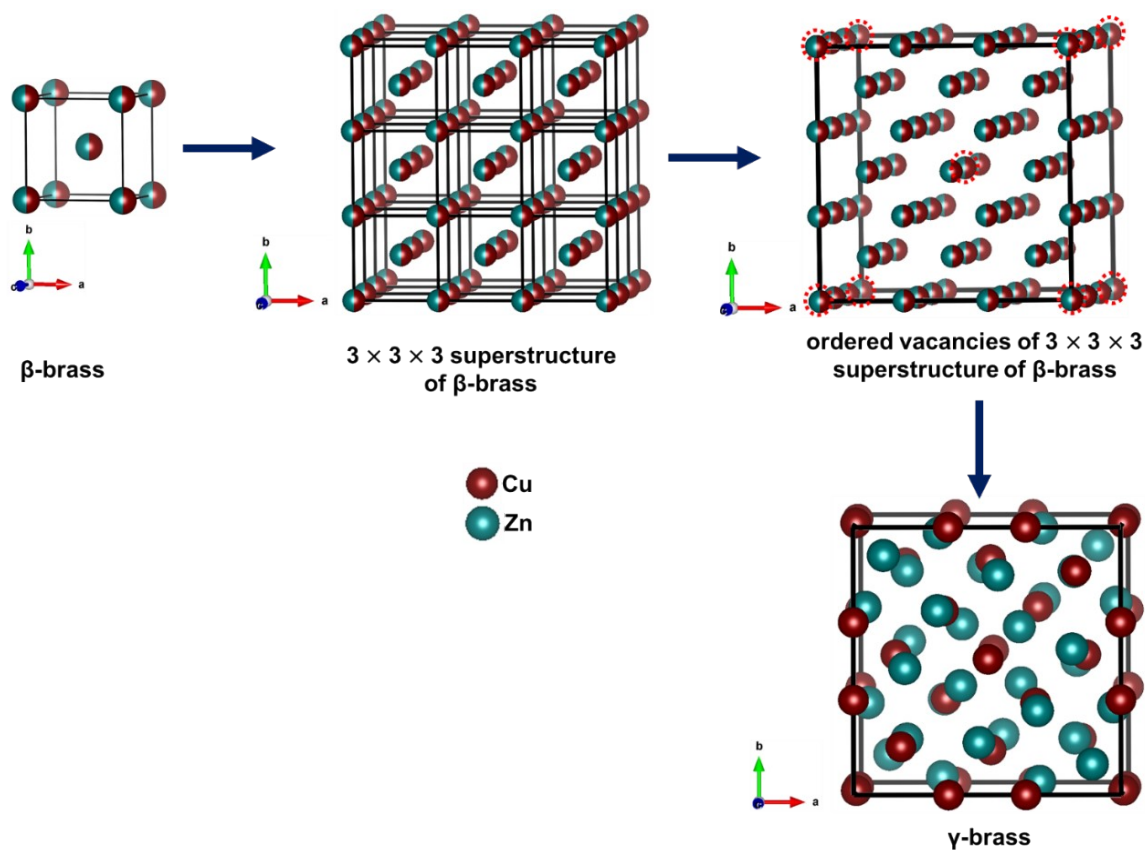

Fig. S5. Construction of  $\gamma$ -brass ( $\text{Cu}_5\text{Zn}_8$ ) from  $\beta$ -brass ( $\text{CuZn}$ ) structure.

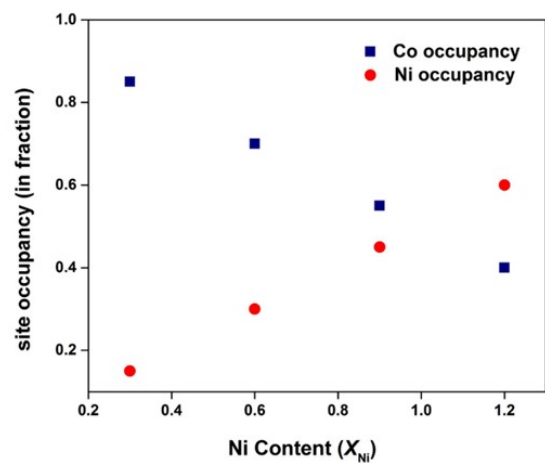

Fig. S6. Distribution pattern of Co and Ni at the OT ( $8c$ ) site as a function of Ni content in  $\text{Co}_2\text{-}_x\text{Ni}_x\text{Zn}_{11}$  suggested by SCXRD and EDS measurements.

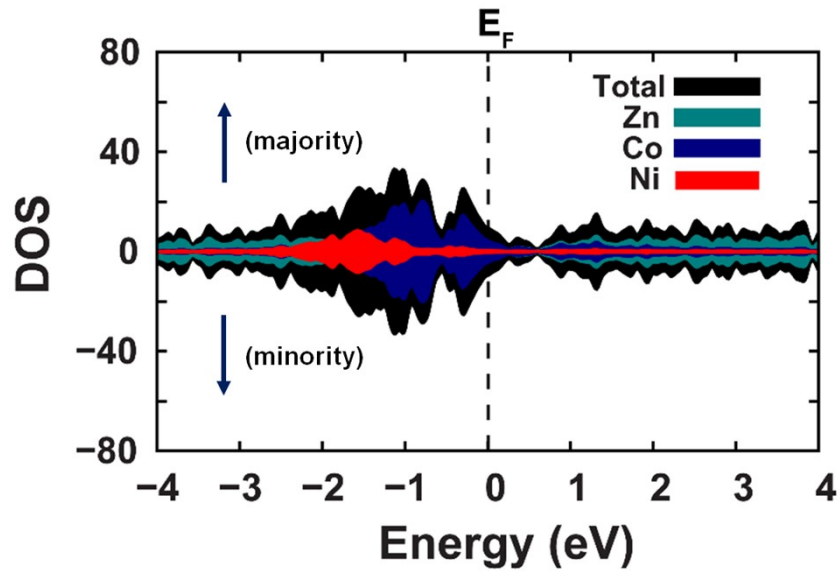

Fig. S7. DOS curve (majority and minority spin) of  $\text{Co}_{1.5}\text{Ni}_{0.5}\text{Zn}_{11}$  pseudo-binary  $\gamma$ -brass compound in the Co–Ni–Zn system.

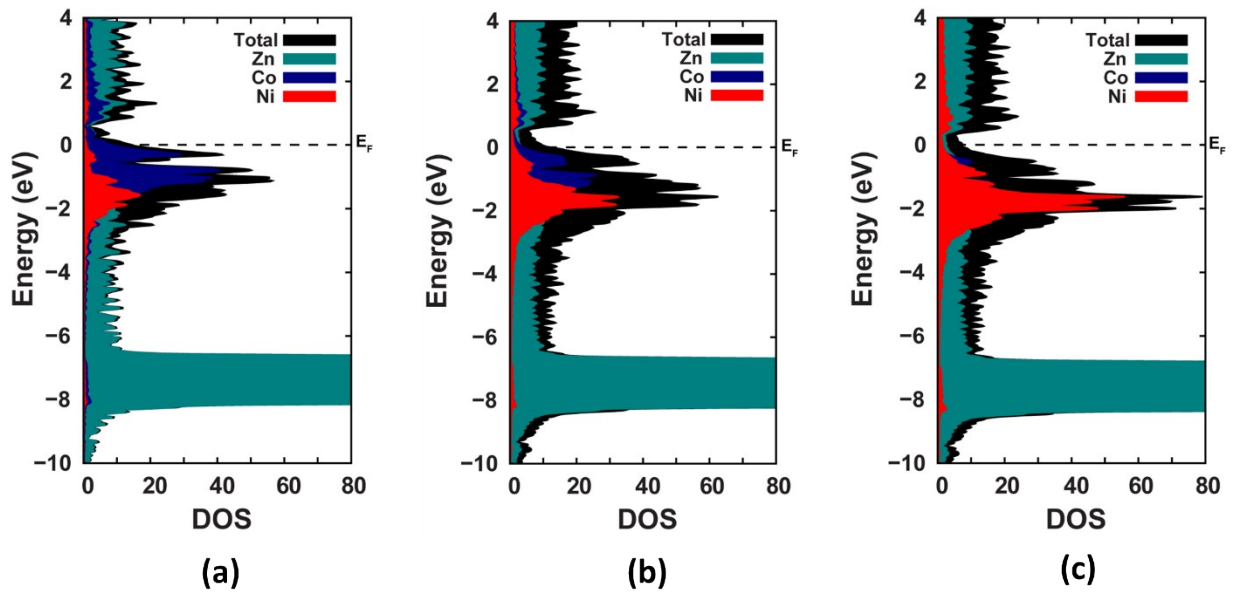

Fig. S8. DOS curves with the energy scale of  $-10$  to  $+4$  eV for (a)  $\text{Co}_{1.5}\text{Ni}_{0.5}\text{Zn}_{11}$ , (b)  $\text{Co}_{1.0}\text{Ni}_{1.0}\text{Zn}_{11}$ , and (c)  $\text{Co}_{0.5}\text{Ni}_{1.5}\text{Zn}_{11}$ .

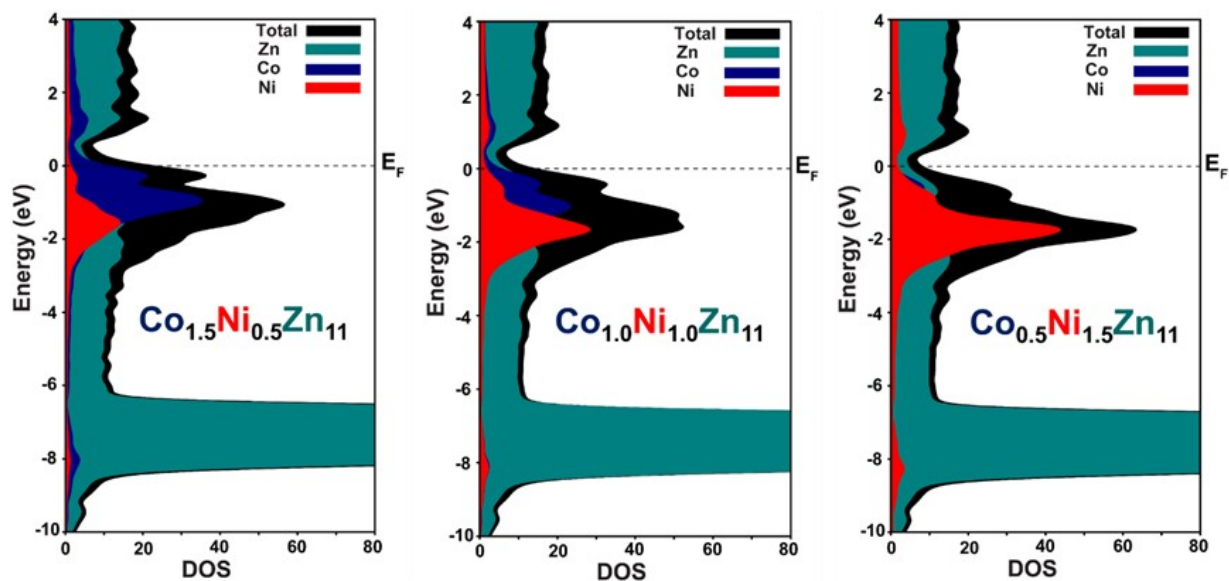

Fig. S9. Representation of total DOS by LOBSTER with the atom projected DOS: (left) “OT model” for  $\text{Co}_{1.5}\text{Ni}_{0.5}\text{Zn}_{11}$ , (middle) “OT model” for  $\text{Co}_{1.0}\text{Ni}_{1.0}\text{Zn}_{11}$ , and (right) “OT model” for  $\text{Co}_{0.5}\text{Ni}_{1.5}\text{Zn}_{11}$ .

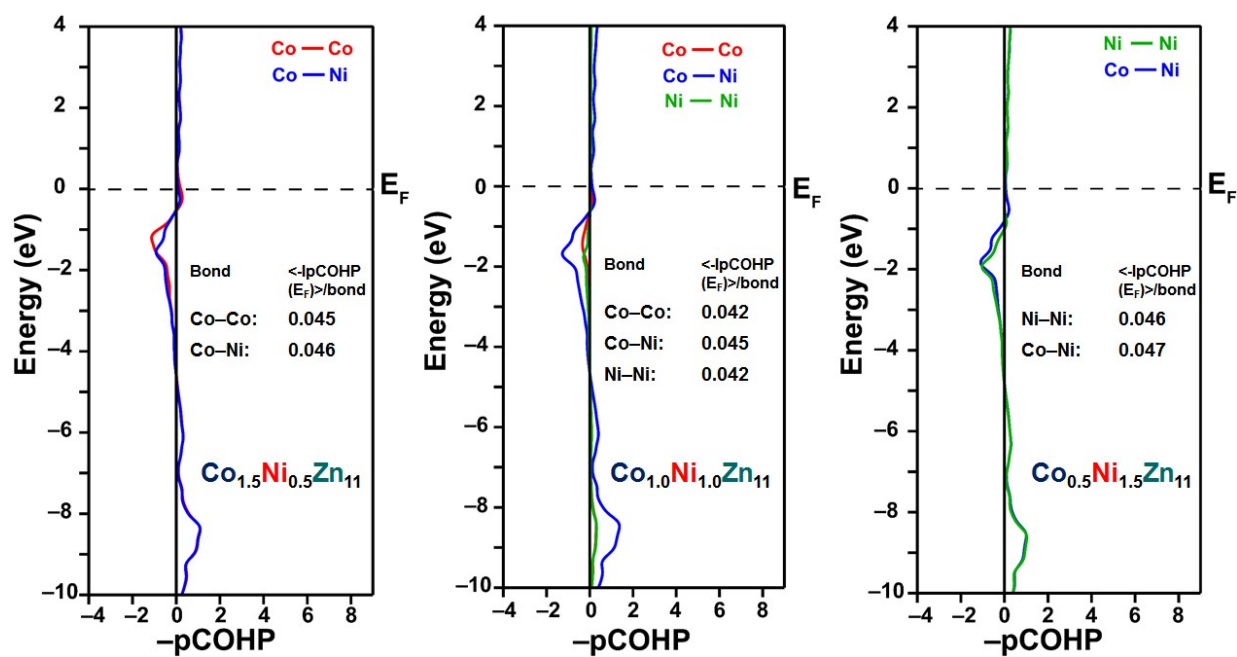

Fig. S10. COHP curves of OT—OT contacts for  $\text{Co}_{1.5}\text{Ni}_{0.5}\text{Zn}_{11}$  (left),  $\text{Co}_{1.0}\text{Ni}_{1.0}\text{Zn}_{11}$  (middle), and  $\text{Co}_{0.5}\text{Ni}_{1.5}\text{Zn}_{11}$  (right).

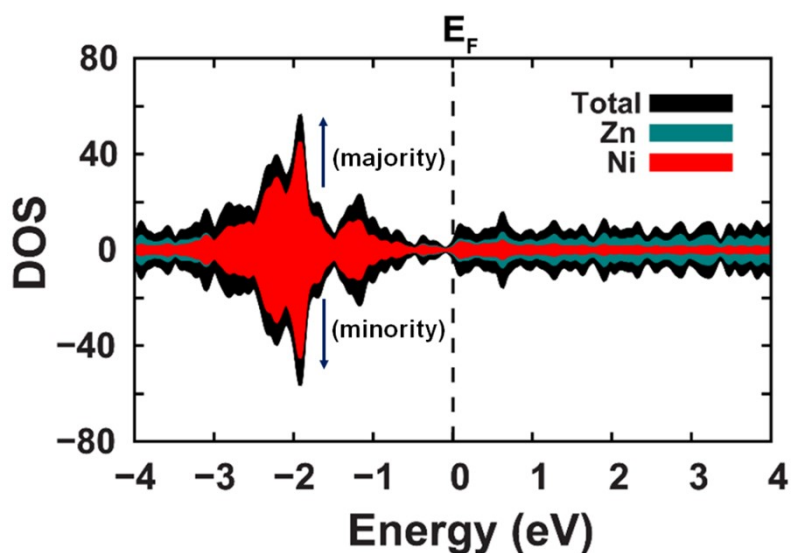

Fig. S11. DOS curve (majority and minority spin) of  $\text{Ni}_2\text{Zn}_{11}$   $\gamma$ -brass compound.

Table S2. Interatomic distances and coordination polyhedron ( $< 3.5 \text{ \AA}$ ) concerning each independent site of  $\text{Co}_{1.1}\text{Ni}_{0.9}\text{Zn}_{11}$  compound.

| Central atom | Atoms   | Interatomic distance ( $\text{\AA}$ ) |
|--------------|---------|---------------------------------------|
| Zn1 (IT)     | 3 Zn2   | 2.6051(6)                             |
|              | 3 Zn3   | 2.6137(5)                             |
|              | 3 Co/Ni | 2.6239(6)                             |
|              | 3 Zn1   | 2.6425(6)                             |
|              | Co/Ni   | 3.4800(6)                             |
| Co1/Ni1 (OT) | 3 Zn3   | 2.5429(5)                             |
|              | 3 Zn3   | 2.5942(5)                             |
|              | 3 Zn1   | 2.6239(6)                             |
|              | 3 Zn2   | 2.7281(5)                             |
|              | 1 Zn1   | 3.4800(6)                             |
| Zn2 (OH)     | 2 Zn1   | 2.6051(6)                             |
|              | 1 Zn2   | 2.6160(8)                             |
|              | 2 Zn3   | 2.6196(4)                             |
|              | 2 Co/Ni | 2.7281(5)                             |
|              | 4 Zn3   | 2.8107(5)                             |
|              | 2 Zn3   | 3.0065(5)                             |
| Zn3 (CO)     | 1 Co/Ni | 2.5429(6)                             |
|              | 1 Co/Ni | 2.5942(5)                             |

|       |           |
|-------|-----------|
| 1 Zn1 | 2.6137(5) |
| 1 Zn2 | 2.6196(5) |
| 4 Zn3 | 2.7241(5) |
| 2 Zn2 | 2.8107(4) |
| 1 Zn2 | 3.0065(5) |
| 2 Zn3 | 3.2948(5) |

Table S3. Site distribution of atoms in a 26-atom  $\gamma$ -

| Composition of the model                             | IT (8c) | OT (8c) | OH (12e) | CO (24g) |
|------------------------------------------------------|---------|---------|----------|----------|
| Co <sub>1.5</sub> Ni <sub>0.5</sub> Zn <sub>11</sub> | 4Zn     | 3Co+1Ni | 6Zn      | 12Zn     |
| Co <sub>1.0</sub> Ni <sub>1.0</sub> Zn <sub>11</sub> | 4Zn     | 2Co+2Ni | 6Zn      | 12Zn     |
| Co <sub>0.5</sub> Ni <sub>1.5</sub> Zn <sub>11</sub> | 4Zn     | 1Co+3Ni | 6Zn      | 12Zn     |

cluster for each composition.

## Section S1.

The formation energies for the model with composition Co<sub>2-x</sub>Ni<sub>x</sub>Zn<sub>11</sub> have been evaluated using the following equation,

$$E_{\text{Formation}} = E_{\text{Total}} - Z \times [ \{(2-x) \times E_{\text{Co}}\} + \{x \times E_{\text{Ni}}\} + \{11 \times E_{\text{Zn}}\} ]$$

Where  $E_{\text{Formation}}$  is the formation energy for the respective model.  $E_{\text{Total}}$  is the calculated total energy.  $Z$  is the formula unit (for  $\gamma$ -brass type phase,  $Z = 4$ ).  $E_{\text{Co}}$ ,  $E_{\text{Ni}}$ , and  $E_{\text{Zn}}$  are the total energies per atom for Co, Ni, and Zn respectively calculated using the stable allotropes of respective elements *e.g.* f.c.c. phase for Ni and the hexagonal phase for both Co and Zn.
